# Supplementary material
Source: PubMed Central journal article supplement (PMC7537785)
Supplement: NIHMS1602263-supplement-1.pdf [file NIHMS1602263-supplement-1.pdf]

Histogram of distances between consecutive loci 36plex

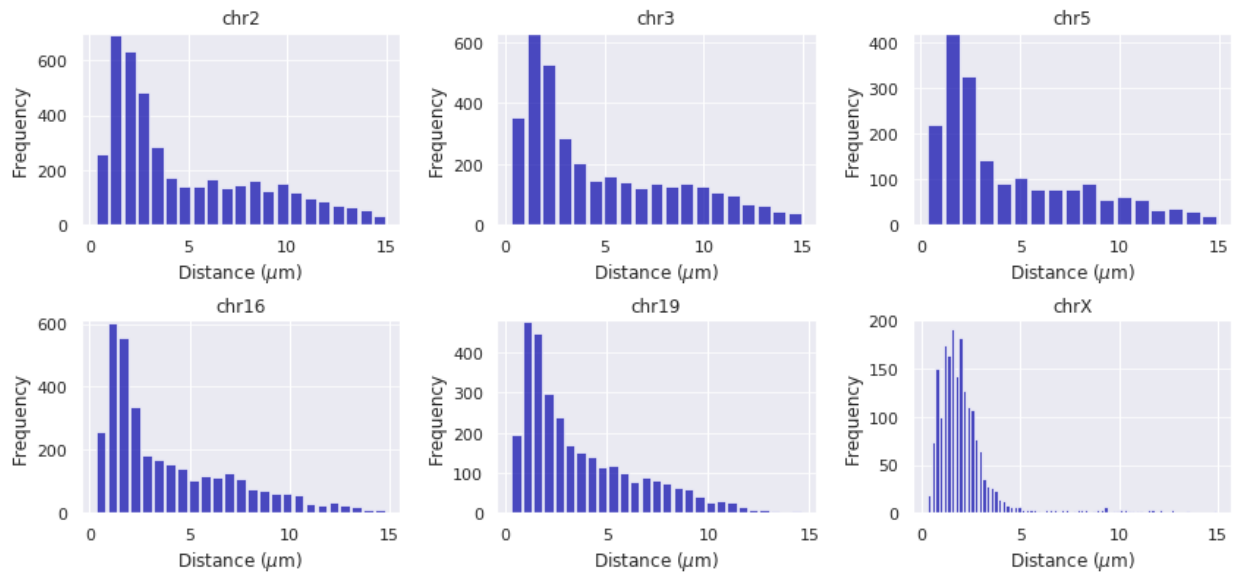

**Supplementary Figure 1.** Histogram of distances between consecutive loci for 36plex library

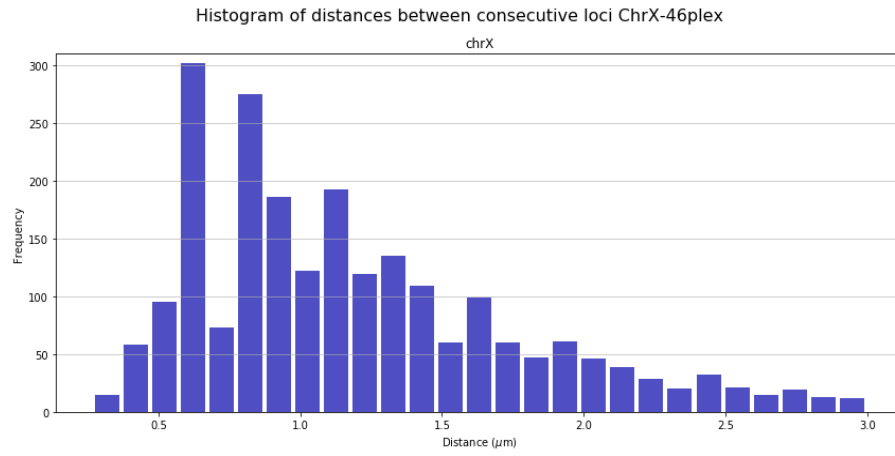

**Supplementary Figure 2.** Histogram of distances between consecutive loci for ChrX-46plex library

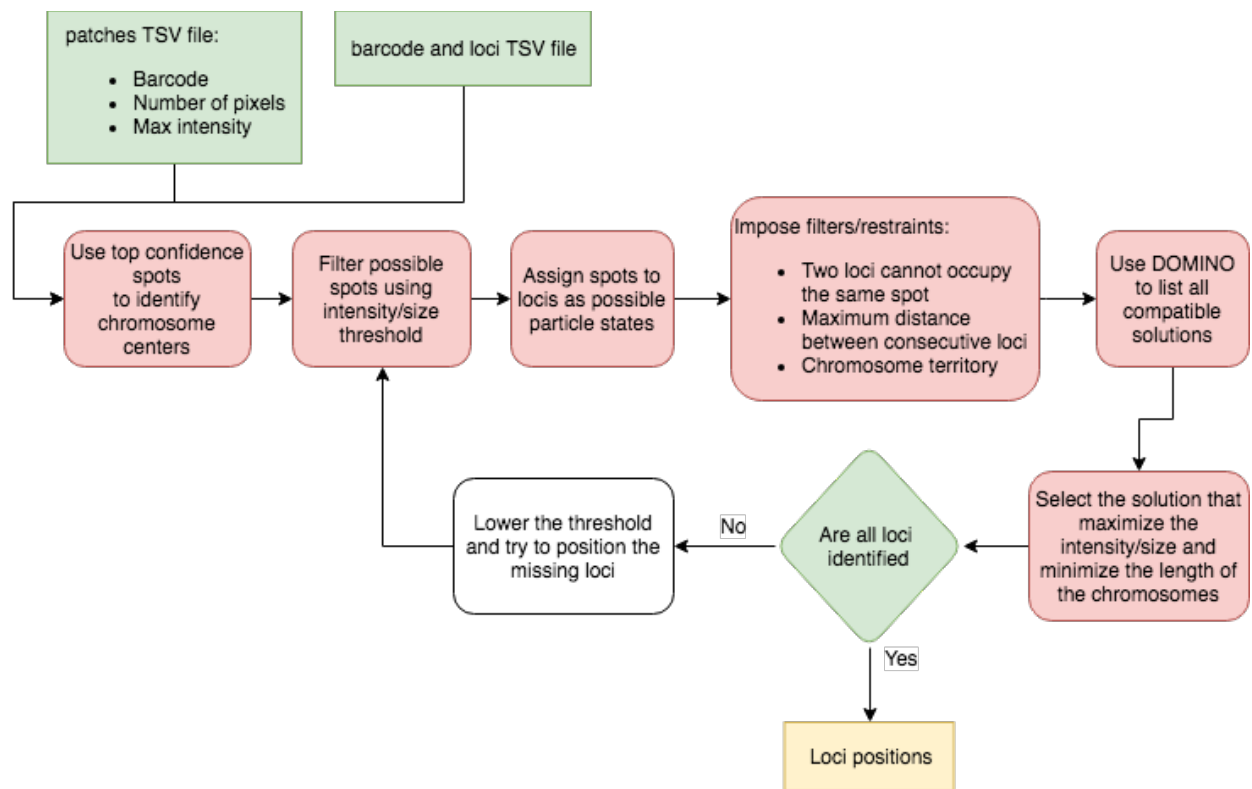

**Supplementary Figure 3.** Workflow chart of the Chromosome tracing process

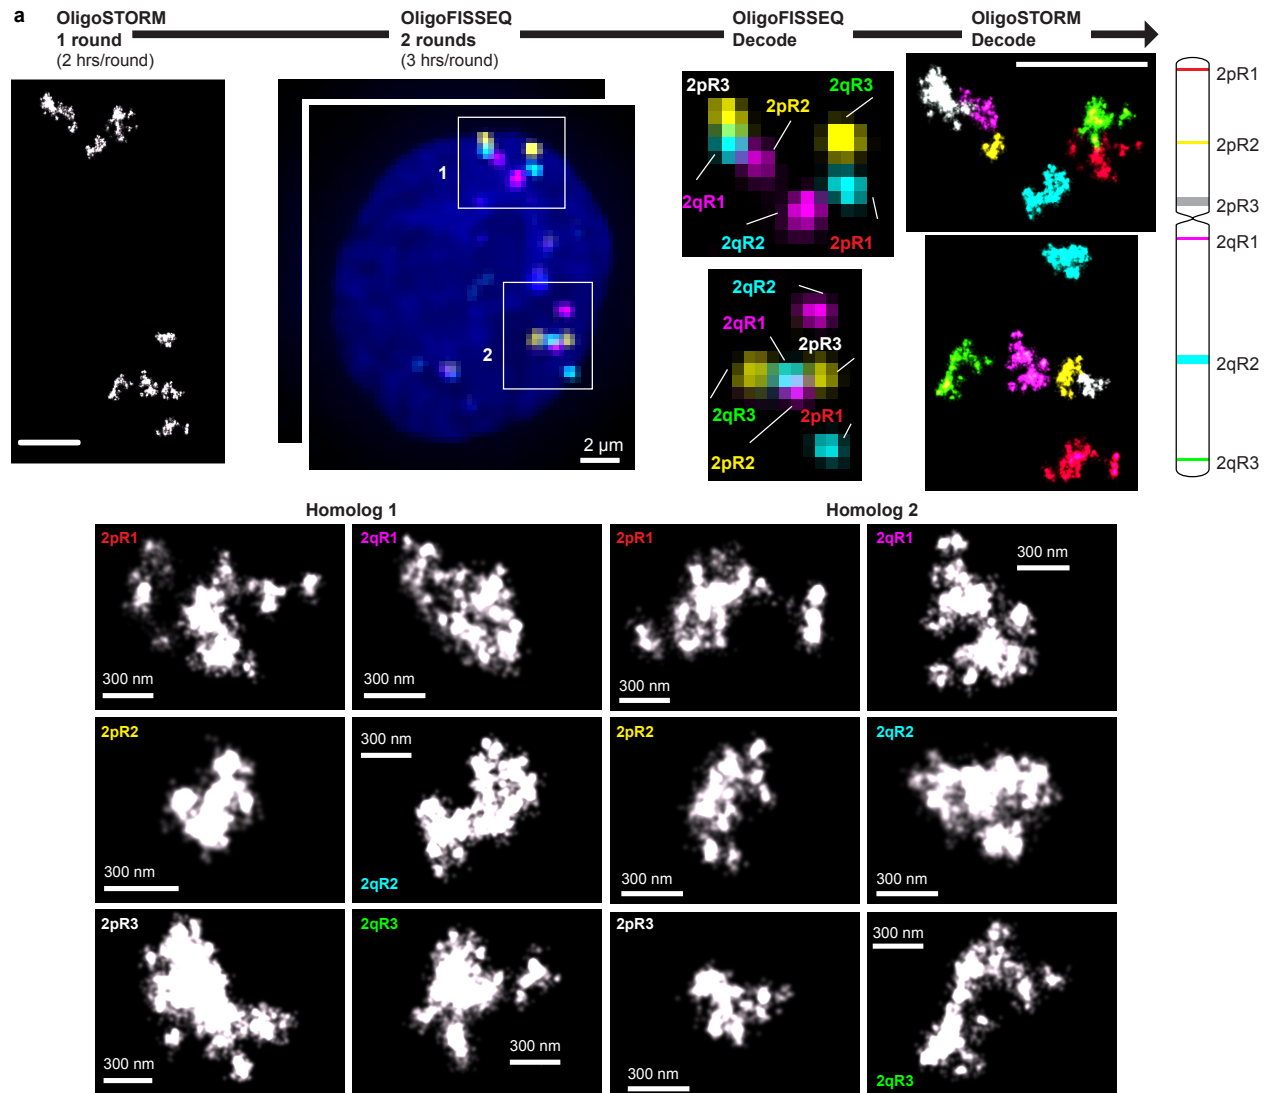

**Supplementary Figure 4.** Combining OligoSTORM and OligoFISSEQ to accelerate super-resolution of Chr2-6plex library

a) Chr2-6plex-5K was hybridized to PGP1f cells and imaged with 1 round of OligoSTORM to visualize all targets simultaneously, followed by 2 rounds of O-LIT to decode targets. Left, OligoSTORM image showing 12 clusters, all unidentified at this point. Middle left, micrograph from first round of O-LIT. Image from deconvolved maximum z-projection. Middle right, zoom-in of targets decoded. Right, identified OligoSTORM images. Bottom, OligoSTORM images for each target. All scale bars represent 300 nm.  $n = 1$ .

## Supplementary Note 1

### 1. Oligonucleotide based in situ hybridization studies to note

- Bienko, M., N. Crosetto, L. Teytelman, S. Klemm, S. Itzkovitz, and A. Oudenaarden Van. 2013. "A Versatile Genome-Scale PCR-Based Pipeline for High-Definition DNA FISH." *Nature Methods* 10 (2): 122–24. <https://doi.org/10.1038/nmeth.2306>.
- Boyle, Shelagh, Matthew J. Rodesch, Heather A. Halvensleben, Jeffrey A. Jeddelloh, and Wendy A. Bickmore. 2011. "Fluorescence in Situ Hybridization with High-Complexity Repeat-Free Oligonucleotide Probes Generated by Massively Parallel Synthesis." *Chromosome Research* 19 (7): 901–9. <https://doi.org/10.1007/s10577-011-9245-0>.
- Dernburg, Abby F., Karl W. Broman, Jennifer C. Fung, Wallace F. Marshall, Jennifer Philips, David A. Agard, and John W. Sedat. 1996. "Perturbation of Nuclear Architecture by Long-Distance Chromosome Interactions." *Cell* 85 (5): 745–59. [https://doi.org/10.1016/S0092-8674\(00\)81240-4](https://doi.org/10.1016/S0092-8674(00)81240-4).
- Femino, Andrea M, Fredric S Fay, Kevin Fogarty, and Robert H Singer. 1998. "Visualization of Single RNA Transcripts in Situ" 280: 7.
- Kislauskis, E. H., Z. Li, R. H. Singer, and K. L. Taneja. 1993. "Isoform-Specific 3'-Untranslated Sequences Sort Alpha-Cardiac and Beta-Cytoplasmic Actin Messenger RNAs to Different Cytoplasmic Compartments." *The Journal of Cell Biology* 123 (1): 165–72. <https://doi.org/10.1083/jcb.123.1.165>.
- Lamb, Jonathan C., Tatiana Danilova, Matthew J. Bauer, Julie M. Meyer, Jennifer J. Holland, Michael D. Jensen, and James A. Birchler. 2007. "Single-Gene Detection and Karyotyping Using Small-Target Fluorescence in Situ Hybridization on Maize Somatic Chromosomes." *Genetics* 175 (3): 1047–58. <https://doi.org/10.1534/genetics.106.065573>.
- Navin, Nicholas, Vladimir Grubor, Jim Hicks, Evan Leibu, Elizabeth Thomas, Jennifer Troge, Michael Riggs, et al. 2006. "PROBER: Oligonucleotide FISH Probe Design Software." *Bioinformatics* 22 (19): 2437–38. <https://doi.org/10.1093/bioinformatics/btl273>.
- O'Keefe, Christine L., Peter E. Warburton, and A. Gregory Matera. 1996. "Oligonucleotide Probes for Alpha Satellite DNA Variants Can Distinguish Homologous Chromosomes by FISH." *Human Molecular Genetics* 5 (11): 1793–99. <https://doi.org/10.1093/hmg/5.11.1793>.
- Raj, Arjun, Patrick van den Bogaard, Scott A. Rifkin, Alexander van Oudenaarden, and Sanjay Tyagi. 2008. "Imaging Individual mRNA Molecules Using Multiple Singly Labeled Probes." *Nature Methods* 5 (10): 877–79. <https://doi.org/10.1038/nmeth.1253>.
- Rogan, Peter K., Patricia M. Cazcarro, and Joan H.M. Knoll. 2001. "Sequence-Based Design of Single-Copy Genomic DNA Probes for Fluorescence In Situ Hybridization." *Genome Research* 11 (6): 1086–94. <https://doi.org/10.1101/gr.171701>.
- Silahtaroglu, Asli N, Niels Tommerup, and Henrik Vissing. 2003. "FISHing with Locked Nucleic Acids (LNA): Evaluation of Different LNA/DNA Mixmers." *Molecular and Cellular Probes* 17 (4): 165–69. [https://doi.org/10.1016/S0890-8508\(03\)00048-3](https://doi.org/10.1016/S0890-8508(03)00048-3).
- Yamada, N. A., L. S. Rector, P. Tsang, E. Carr, A. Scheffer, M. C. Sederberg, M. E. Aston, et al. 2011. "Visualization of Fine-Scale Genomic Structure by Oligonucleotide-Based High-Resolution FISH." *Cytogenetic and Genome Research* 132 (4): 248–54. <https://doi.org/10.1159/000322717>.

## Supplementary Note 2

### 2.1 Past In situ sequencing studies to note

- McKernan, K. J., H. E. Peckham, G. L. Costa, S. F. McLaughlin, Y. Fu, E. F. Tsung, C. R. Clouser, et al. 2009. “Sequence and Structural Variation in a Human Genome Uncovered by Short-Read, Massively Parallel Ligation Sequencing Using Two-Base Encoding.” *Genome Research* 19 (9): 1527–1541. <https://doi.org/10.1101/gr.091868.109>.
- Mitra, R D, and G M Church. 1999. “In Situ Localized Amplification and Contact Replication of Many Individual DNA Molecules.” *Nucleic Acids Research* 27 (24): e34.
- Mitra, Robi D, Jay Shendure, Jerzy Olejnik, Edyta-Krzyszowska-Olejnik, and George M Church. 2003. “Fluorescent in Situ Sequencing on Polymerase Colonies.” *Analytical Biochemistry* 320 (1): 55–65. [https://doi.org/10.1016/S0003-2697\(03\)00291-4](https://doi.org/10.1016/S0003-2697(03)00291-4).
- Shendure, Jay, Gregory J. Porreca, Nikos B. Reppas, Xiaoxia Lin, John P. McCutcheon, Abraham M. Rosenbaum, Michael D. Wang, Kun Zhang, Robi D. Mitra, and George M. Church. 2005. “Accurate Multiplex Polony Sequencing of an Evolved Bacterial Genome.” *Science* 309 (5741): 1728–32. <https://doi.org/10.1126/science.1117389>.
- Valouev, Anton, Jeffrey Ichikawa, Thaisan Tonthat, Jeremy Stuart, Swati Ranade, Heather Peckham, Kathy Zeng, et al. 2008. “A High-Resolution, Nucleosome Position Map of *C. Elegans* Reveals a Lack of Universal Sequence-Dictated Positioning.” *Genome Research*. <https://doi.org/10.1101/gr.076463.108>.

### 2.2 Present In situ sequencing studies to note

- Alon, Shahar, Daniel Goodwin, Anubhav Sinha, Asmamaw Wassie, Fei Chen, Evan Daugharthy, Yosuke Bando, et al. 2020. “Expansion Sequencing: Spatially Precise In Situ Transcriptomics in Intact Biological Systems.” Preprint. Genomics. <https://doi.org/10.1101/2020.05.13.094268>.
- Chen, Xiaoyin, Yu-Chi Sun, George M Church, Je Hyuk Lee, and Anthony M Zador. 2018. “Efficient in Situ Barcode Sequencing Using Padlock Probe-Based BaristaSeq.” *Nucleic Acids Research* 46 (4): e22–e22. <https://doi.org/10.1093/nar/gkx1206>.
- Chen, Xiaoyin, Yu-Chi Sun, Huiqing Zhan, Justus M. Kobschull, Stephan Fischer, Katherine Matho, Z. Josh Huang, Jesse Gillis, and Anthony M. Zador. 2019. “High-Throughput Mapping of Long-Range Neuronal Projection Using In Situ Sequencing.” *Cell* 179 (3): 772-786.e19. <https://doi.org/10.1016/j.cell.2019.09.023>.
- Feldman, David, Avtar Singh, Jonathan L. Schmid-Burgk, Rebecca J. Carlson, Anja Mezger, Anthony J. Garrity, Feng Zhang, and Paul C. Blainey. 2019. “Optical Pooled Screens in Human Cells.” *Cell* 179 (3): 787-799.e17. <https://doi.org/10.1016/j.cell.2019.09.016>.
- Fürth, Daniel, Victor Hatini, and Je H. Lee. 2019. “In Situ Transcriptome Accessibility Sequencing (INSTA-Seq).” Preprint. Genomics. <https://doi.org/10.1101/722819>.
- Lee, Je Hyuk, Evan R Daugharthy, Jonathan Scheiman, Reza Kalhor, Thomas C Ferrante, Richard Terry, Brian M Turczyk, et al. 2015. “Fluorescent in Situ Sequencing (FISSEQ) of RNA for Gene Expression Profiling in Intact Cells and Tissues.” *Nature Protocols* 10 (3): 442–458. <https://doi.org/10.1038/nprot.2014.191>.
- Rodrigues, Samuel G., Robert R. Stickels, Aleksandrina Goeva, Carly A. Martin, Evan Murray, Charles R. Vanderburg, Joshua Welch, Linlin M. Chen, Fei Chen, and Evan Z. Macosko.

2019. “Slide-Seq: A Scalable Technology for Measuring Genome-Wide Expression at High Spatial Resolution.” *Science* 363 (6434): 1463–67.  
<https://doi.org/10.1126/science.aaw1219>.
- Ståhl, Patrik L., Fredrik Salmén, Sanja Vickovic, Anna Lundmark, José Fernández Navarro, Jens Magnusson, Stefania Giacomello, et al. 2016. “Visualization and Analysis of Gene Expression in Tissue Sections by Spatial Transcriptomics.” *Science* 353 (6294): 78–82.  
<https://doi.org/10.1126/science.aaf2403>.
- Vickovic, Sanja, Gökçen Eraslan, Fredrik Salmén, Johanna Klughammer, Linnea Stenbeck, Denis Schapiro, Tarmo Äijö, et al. 2019. “High-Definition Spatial Transcriptomics for in Situ Tissue Profiling.” *Nature Methods* 16 (10): 987–90. <https://doi.org/10.1038/s41592-019-0548-y>.
- Wang, Xiao, William E. Allen, Matthew A. Wright, Emily L. Sylwestrak, Nikolay Samusik, Sam Vesuna, Kathryn Evans, et al. 2018. “Three-Dimensional Intact-Tissue Sequencing of Single-Cell Transcriptional States.” *Science* 361 (6400): eaat5691.  
<https://doi.org/10.1126/science.aat5691>.

## Supplementary Protocol 1

### T7 Oligopaint Synthesis – Wu Lab Protocol

(Adapted from MERFISH protocol, Zhuang lab, Chen et al 2015 Science)

#### Overview of the method:

- 1) Amplification of the library, low cycle (~25 cycles)
- 2) Another amplification round from the product from step 1, and using touch-up PCR to add the T7 promoter to the reverse strand
- 3) T7 RNA synthesis (overnight incubation)
- 4) Reverse transcriptase for single-stranded DNA probe synthesis
- 5) Degradation of RNA via alkaline hydrolysis
- 6) Purification of ssDNA

#### “Linear” PCR of Library or Sub-library

· Goal: since the amount of “raw” library is limited (ie. CustomArray produces around 80 ul of a library at around 50-100 ng/ul), we regularly preform PCR to produce more template

#### Materials:

- DNA Clean and Concentrator Kit -5 (Zymo D4013 or D4014)
- Library (ie. Customarray 90K Oligo Pool)
- Taq (Kapa BK1002)
- dNTPs (10 mM stock)

| Reagent                       | Initial | Final    | 1 reaction |
|-------------------------------|---------|----------|------------|
| Kapa Buffer A                 | 10x     | 1x       | 10 ul      |
| Forward Primer                | 200 uM  | 2 uM     | 1 ul       |
| Reverse Primer                | 200 uM  | 2 uM     | 1 ul       |
| dNTP mix                      | 10 mM   | 0.4 mM   | 4 ul       |
| Kapa Taq*                     | 5 U/ul  | 5 U      | 1 ul       |
| Raw library**                 |         | 10-30 ng | 1 ul       |
| Water ( <b>up to 100 ul</b> ) |         |          | 82 ul      |

\*you can opt to use different Taq if you wish, but we generally use Kapa Taq for our experiments

\*\*if your library has many sub-libraries, you want to scale the amount of library you use to bring up the sub-library amount to approximately 10-30 ng optimally

- 1) Linear PCR program -95C-5min, (95C-30s, **58C**-30s, 72C-15s)X**25**, 72C-5min



- 2) Purify with Zymo-5 kit, following manufacturer's instructions (2X PCR volume of DNA Binding Buffer + 4X PCR volume of 100% EtOH → then load onto columns)
  - a. We also add an additional spin step after last wash (max speed, no buffer) to remove residual ethanol from wash buffer
- 3) resuspend in ~30 ul of water
- 4) Expected yield: ≥ 20 ng/ul

**Bulk touch-up PCR – to add T7 promoter**

- Goal: produce PCR product with the T7 promoter, enough to produce 500 ng – 1 ug of product

Materials

- Reverse Primer with T7 promoter sequence
- Add TAATACGACTCACTATAGGG to the 5' end of the reverse primer
- Note that T7 synthesis later adds the last three Gs into the sequence

- 1) Make the following master mix
  - a. Here we are doing a 50x reaction so that we have enough template to do multiple T7 reactions in the future – you can scale this according to your expected usage

| Reagent                  | Initial | Final  | 1 reaction | 50 reactions |
|--------------------------|---------|--------|------------|--------------|
| Kapa Buffer A            | 10x     | 1x     | 10 ul      | 500 ul       |
| Forward                  | 10uM    | 0.4 uM | 4ul        | 200ul        |
| Reverse (T7)             | 10uM    | 0.4 uM | 4ul        | 200ul        |
| dNTP mix                 | 10mM    | 0.2 mM | 4ul        | 200ul        |
| Kapa Taq                 |         |        | 1ul        | 50ul         |
| Linear-amplified library | 1 ng/ul | 1 ng   | 1ul        | 50ul         |
| Water (up to 100 ul)     |         |        | 76ul       | 3.8ml        |
|                          |         | Total  | 100 ul     |              |

- 1) Do new program (based on EH1) T7PCR35 -95C-5min, (95C-30s, 60C-30s, 72C-15s)X35, 72C-5min
- 2) Purify – using Zymo-100 column for PCR purification, (2X PCR volume of DNA Binding Buffer + 4X PCR volume of 100% EtOH → then load onto columns) elute in 150 ul of water
- 3) **Expected Result**: you want samples to be around 75 ng/ul or more

### T7 Reaction (using manufacturer's suggestions)

- Goal: produce excess RNA in order to maximize the amount of dNTPs
- 1 reaction can produce around 750 to 1500 pmol of probe

#### Materials

- T7 HiScribe Kit (NEB E2040S)
- Zymo-100 DNA Clean and Concentrator Kit (D4029 or D4030)
- RNaseOUT (Thermo, 10777019)

- 1) Measure DNA to make sure amplification worked , run on gel
- 2) Use 1 ug of DNA per reaction
  - a. While you may opt to do 1 reaction, for large scale probe synthesis you can fit 4x reactions comfortably in a 1.5 ml tube
  - b. If you decide on the larger format (1.5 ml tube), make sure you have proper equipment to do incubations later on (at 37 °C, 50 °C, 85 °C, and 95 °C)

| Reagent               | Initial | Final           | 1x reaction (manufacturer) | 4x reactions |
|-----------------------|---------|-----------------|----------------------------|--------------|
| DNA (1.3ug/RXN)       |         | >1.3ug/Reaction | 7                          | 28           |
| Water                 |         |                 |                            |              |
| ATP (provided by kit) |         |                 | 2                          | 8            |
| CTP (provided by kit) |         |                 | 2                          | 8            |
| GTP (provided by kit) |         |                 | 2                          | 8            |
| UTP (provided by kit) |         |                 | 2                          | 8            |
| T7 buffer             |         |                 | 2                          | 8            |
| RNaseOUT              |         |                 | 1                          | 4            |
| T7 Pol Mix            |         |                 | 2                          | 8            |
|                       |         | Total           | 20                         | 80           |

### RT PCR:

- Goal: convert RNA to DNA

#### Materials

- Forward Primer
  - a. you can opt to use a forward primer that is unlabeled (for labeling in situ with secondary fluor-conjugated oligos) or you can use labeled primers. However, primers that are labeled with NHS-Ester linkages may be sensitive to alkaline hydrolysis in the next step (see **Murgha et al. 2015**) ; Cy3 and Cy5 oligos from IDT seem to survive the process, which may be due to linkage independent of NHS chemistry
- dNTPs (**25 mM stock**)
  - a. take individual dNTPs at 100 mM concentration, and mix together to at 1:1:1:1 volume to produce 25 mM stock
- maxima RT –H (Thermo, EP0751)
- RNaseOUT (Thermo, 10777019)

No need to purify the T7 sample; add RT reagents right into tube and incubate

| Reagent        | Initial      | Final     | 1 reaction | 4 reactions | Huy's 4X |
|----------------|--------------|-----------|------------|-------------|----------|
| T7 sample      |              |           | 20         | 80          | 80       |
| Water          |              |           | 79.4       | 317.6       | 77.6     |
| Forward primer | 200 uM       | 1500 pmol | 7.5 ul     | 30          | 30       |
| dNTP mix       | <b>25 mM</b> | 1.6 mM    | 9.6 ul     | 38.4        | 38.4     |
| RT buffer      | 5x           | 1x        | 30 uL      | 120         | 60       |
| RNaseOUT       |              |           | 1.5 uL     | 6           | 6        |
| Maxima RT -H   |              |           | 2 uL       | 8           | 8        |
|                |              | Total     | 150 uL     | 600         | 300      |

- 1) Incubate for **two hours** at 50 °C (this is longer than manufacturer suggestion)
- 2) Inactivate RT at 85 C for 5 min

#### **RNA degradation via alkaline hydrolysis:**

- Goal: removal of RNA from the RNA:DNA hybrids, and removal of excess RNA not converted to cDNA

#### Materials

- EDTA (0.5 M)
- NaOH (1 M)

- 1) Digest remaining RNA:
  - a. by mixing 0.5 EDTA and 1 M NaOH, 1:1 to each other, and then add to RT reaction at equal volume (final conc: 0.25 M NaOH)
    - i. 1x reaction: add 150 ul of EDTA-NaOH mixture to each sample
    - ii. 4x reaction: add 600 ul
  - b. Heat at 95 °C for 10 min
    - i. Alternative alkaline hydrolysis temperatures and times may also work
  - c. Put on ice and proceed right away with purification
  - d. Total rxn vol:
    - i. 300 ul for 1x reaction
    - ii. 1200 ul for 4x reaction

#### **Purification with Zymo-100 kit**

#### Materials

- Zymo-100 DNA Clean and Concentrator Kit (D4029 or D4030)
- We use this kit because of the scalability to purify 100 ug of DNA, but because the oligos are single stranded and short, we DO NOT use DNA binding buffer
- Instead, we use Oligo binding buffer (purchased separately)
- Oligo Binding Buffer, 40 ml (D4060-1-40)
- Wash Buffer (additional bottles - D4003-2-48)

- 1) Add Oligo binding buffer (ordered separately from Zymo) (2x rxn vol = 2400 ul)
- 2) Add 100% Ethanol (4x oligo binding buffer = 9600 ul)
- 3) Purify on column and follow manufacturer instructions
  - a. Because the column has a 100 ug capacity, split your samples accordingly (ie. if you are doing a 4x reaction, split your mixture into 4, and run it on the column 4 times)
  - b. To concentrate the sample, use the eluate from the 1<sup>st</sup> purification to elute the 2<sup>nd</sup> purification, and continue this

#### **Calculate Yield**

- 1) ng/ul to pmol/ul conversion:
  - Formula: ( ng/ul concentration) \* (1E3 pg/ ng) \* (1 pmol nucleotides / 330 pg) \* (1 /length in nucleotides)
  - [conc] \* 3.03 \* (1/length) = \_\_\_\_ pmol/ul
- 2) Total pmol amount - Multiply concentration to elution volume
- 3) Calculate yield by: probe (pmol)/RT primer (pmol) \* 100
  - We generally get 50% yield or more

## Supplementary Protocol 2

### Oligopaint FISH on Slides

#### DAY 1 (2-3hrs):

- Plate cells onto 1mm glass microscope slides; score/etch cell area with diamond pen
- 100uL of cells per spot

#### FISH 1o (2-3hrs):

- Perform in glass coplin jars (35-40mL)
- 1) Rinse: 1X PBS wash; **5 min @ RT**
- 2) Fix Cells; 4% Formaldehyde/PBS; (40mL = 10mL 16% formaldehyde + 4mL 10X PBS + 26mL H2O); **10 min @ RT**
- 2a) 1XPBS rinse
- 3) Permeabilize; 0.5% Triton/PBS; (40mL = 200uL Triton X-100 + 40mL 1X PBS); **15 min @ RT**
- 4) PBT (PBS + 0.1% Triton) wash; **5 min @ RT**
- 5) 0.1N HCl; 0.1N HCl/H2O; (40mL = 500uL 8N HCl + 39.5mL H2O); **5min @ RT**
- 6) 2XSSCT washes; **2x 5min @ RT**
- 7) Pre-hybe RT; 50% Formamide/2XSSCT; **10min @ RT**
- 8) Pre-hybe 60oC; 50% Formamide/2XSSCT; **20min @ 60oC**
- 9) 1o Oligopaint Hybridization;
- \*\*\*Prepare while sample is pre-hybing
- \*\*\*Air dry slides and wipe around cell area
- \*\*\*Generally, 100pmol per slide
- \*\*\*8X Hybe Buffer: 27-40% Crowding Agent (Dextran sulfate OR Polyacrylic Acid ~1200MW) + 8XSSCT
- \*\*\*Add to cells → cover with 22x22mm coverslip → seal edges with rubber cement → allow to dry before

denaturing

| Reagent       | Stock      | Final         | Amount |
|---------------|------------|---------------|--------|
| Formamide     |            | 1             | 0.5    |
| Hybe Buffer   | 8X         | 2X            | 6.25   |
| RNaseA        | 10mg/uL    | 20mg          | 2      |
| 1o Oligopaint | 100pmol/uL | 100pmol (4uM) | 1      |
| H2O           | n/a        | n/a           | 3.25   |

- 10) Denature sample; **3min @ 80oC**
- \*\*\*Perform on hot block
- 11) Hybridization; transfer samples to humid chamber and hybridize O/N @ **(42oC)**

#### Day 2:

#### FISH 2o (~2hrs):

- 1) 2XSSCT hot wash; **20min @ 60oC**
- 2) 2XSSCT washes @ RT; **2x 7min @ RT**
- 3) 30% formamide/2XSSCT wash; **7min @ RT**
- 4) 2o Oligo; **>1hr @ RT**
- \*\*\*25uL per slide \*\*\*Protect from light

| Reagent   | Stock     | Final          | Amount |
|-----------|-----------|----------------|--------|
| Formamide | 100%      | 30%            | 7.5    |
| SSCT      | 4X        | 2X             | 12.5   |
| 2o Probe  | 10pmol/uL | 30pmol (1.2uM) | 3      |

|            |     |     |   |
|------------|-----|-----|---|
| <b>H2O</b> | n/a | n/a | 2 |
|------------|-----|-----|---|

- 5) 30% Formamide/2XSSCT washes; **20min @ RT**
- 6) 2XSSCT washes; **2x 10min @ RT**
- 7) 1XPBS wash; **1x 10min @ RT**
- 8) Mount with No1.5 coverslip using Antifade with DAPI and seal edges with nail polish
- 9) Party.

## Supplementary Protocol 3

### OligoFISSEQ-LIT on Ibidi Slides

#### DAY 1 (2-3hrs):

- Plate cells into Ibidi Sticky cell chambers (6 channels)
- 130-150uL per channel of reagent

#### FISH 1o (3-4hrs):

- 1) Aspirate media: 1X PBS wash; **5 min @ RT**
  - 2) Fix Cells; 4% Formaldehyde/PBS; (1mL = 250uL 16% formaldehyde + 100uL 10X PBS + 650uL H<sub>2</sub>O); **10 min @ RT**
  - 3) Permeabilize; 0.5% Triton/PBS; (1mL = 5uL Triton X-100 + 995uL 1X PBS); **15 min @ RT**
  - 4) PBT (PBS + 0.1% Triton) wash; **5 min @ RT**
  - 5) 0.1N HCl; 0.1N HCl/H<sub>2</sub>O; (1mL = 12.5uL 8N HCl + 987.5uL H<sub>2</sub>O); **8min @ RT**
  - 6) 2XSSCT wash; **1x 5min @ RT**
  - 6a) RNase treat; 2uL/50uL 2XSSCT; **1hr @ 37oC**
  - 6b) 2XSSCT wash in, asp, then; **2min @ RT**
  - 7) Pre-hybe RT; 50% Formamide/2XSSCT; **>30min @ RT**
  - 8) Pre-hybe 60oC; 50% Formamide/2XSSCT; **>30min @ 60oC**
- \*\*\*Prepare 1o while sample is pre-hybing
- 9) 1o Oligopaint Hybridization;
- \*\*\*Generally, 100pmol per channel of each probe
- \*\*\*8X Hybe Buffer: 40% Crowding Agent (Dextran sulfate) + 8XSSCT

| Reagent          | Stock      | Final         | Amount |
|------------------|------------|---------------|--------|
| Formamide        |            | 1 0.5         | 25     |
| Hybe Buffer      | 8X         | 2X            | 12.5   |
| RNaseA           | 10mg/uL    | 20mg          | 2      |
| 1o Oligopaint    | 100pmol/uL | 100pmol (2uM) | 1      |
| H <sub>2</sub> O | n/a        | n/a           | 9.5    |

- 10) Denature sample on hot block under weight; **3min @ 80oC**
- 11) Hybridization; transfer samples to humid chamber and hybridize O/N @ **(44.5oC)**

#### Day 2 (8+hrs, or can split up; 4hrs):

- 3) 2XSSCT washes; **2x 15min @ 60oC, then wash in 60oC at RT**
- \*\*\*Add 100uL pre-heated 2XSSCT into channels with 1o Oligopaint; **aspirate, then wash more in**
- \*\*\*On hot block as before
- 4) 2XSSCT washes @ RT; **2x 7min @ RT**
- \*\*\*wash in 60oC 2XSSCT then do 1st at RT
- 4a) CutSmart Buffer wash; 1X (50uL) in H<sub>2</sub>O; **1x 10min @ RT**
  - 4b) Shrimp Phosphatase (NEB) treatment; 7.5U/50uL RXN; **1hr @ 37oC humid**
  - 4c) Inactivate Phosphatase; transfer slide to 65oC heatblock; **5min**
  - 4d) 2XSSCT washes @ 65oC, wash in, asp, then; **2x 7min @ 65oC**
  - 4e) 2XSSCT washes @ RT; **2x 7min @ RT**
- #### FISH 2o + Seq Primer (~2hrs):
- 5a) 30% formamide/2XSSCT (1.5mL Formamide + 1mL UPW + 2.5mL 4XSSCT); **1x 7min @ RT**
  - 5) 2o Oligo + Sequencing Oligo Hybridization in 30% formamide; **>30min @ RT**
- \*\*\*50uL volume per channel; make up with UPW
- \*\*\*~40pmol of seq primer, ~30pmol of bridge/2o oligo
- \*\*\*Protect from light
- 6) 30% Formamide/2XSSCT wash in, asp, then; **2x 20min @ RT humid**
  - 7) 2XSSCT washes; **1x 10min @ RT**

7a) DAPI; 1:1000 in PBS; **10min @ RT**

8a) 1XPBS washes; **1x 10min @ RT**

8b) 2XSSCT wash; **1x 10min @ RT**

**\*\*\*Can pause here and continue the next day**

**Sequencing by Ligation (3hrs for SBL; 1.5hrs for QC; 2hrs for Cleave, excluding imaging):**

3) Pre-Ligation wash; 1X *Quick Ligation Buffer (5X)*/H<sub>2</sub>O; **100uL/ch; 10min @ RT**

4) Sequence by ligation; **100uL/ch; 1hr @ 25oC**

| Reagent             | Stock                                 | Amount |
|---------------------|---------------------------------------|--------|
| Quick Ligase Buffer | NEB; 2X                               | 50     |
| Quick Ligase (T4)   | NEB; 2KU/uL                           | 5      |
| T3 Ligase           | NEB; 3KU/uL                           | 5      |
| SOLiD Oligos        | <a href="#">5500 W SOLiD FWD75; ?</a> | 2      |
| UPW                 |                                       | 38     |

**\*\*\*Put in 25oC Drosophila incubator**

5) 2XSSCT rinse; **3x @ RT**

6) 1M Guanadine Hydrochloride (GHCL) ; **2x 20min @ RT**

a7) 1XPBS washes; **1x 10min @ RT**

7) PBS wash; **7min RT**

8) TrueBlack treat?; 1:20 in 70% EtOH (70uL EtOH + 250uL UPW + 50uL Trueblack); **1x 2min @ RT**

**\*\*\*If using TB, do not use detergent (tween/triton) in any further steps until after imaging**

9) PBS rinse x3 then **10min @ RT**

10) Image in imaging buffer: to make 1mL:

| Reagent | Stock  | Amount |        | Recipe                                                                          |
|---------|--------|--------|--------|---------------------------------------------------------------------------------|
| Trolox  | "100X" | 15     | Trolox | 100mg Trolox + 430uL MeOH + 345uL 1M NaOH + 3.2mL UPW                           |
| PCD     | "100X" | 15     | PCD    | 6.3mg PCD + 9mL buffer [50% glycerol + 50mM KCl + 1mM EDTA + 100mM Tris HCl 8.0 |
| PCA     | "40X"  | 40     | PCA    | 154mg PCA in 10mL UPW; pH 9 with NaOH                                           |
| PBS     | 1X     | 930    |        |                                                                                 |

11) PBS wash; **1x 5min @ RT**

12) 2XSSCT wash: **3x 5min @ RT**

**\*\*\*Wash until liquid is clear**

13) CutSmart Buffer wash; 1X (50uL) in H<sub>2</sub>O; **1x 7min @ RT**

14) Quick CIPhosphatase (NEB); 2.5uL/50uL RXN; **35min @ 37oC humid**

15) 2XSSC/T rinses then wash; **3x, then 2x 20min @ RT**

16) PBS wash; **1x 10min @ RT**

17) 0.1XPBS rinse; **1x @ RT**

18) Cleave SBL: Shyam Cleave Buffer 1; **100uL/well; rinse then 15min @ RT**

**\*\*\*Cleave Buffer 1: 50mM AgNO<sub>3</sub> (1:1 [0.1N AgNO<sub>3</sub> + UPW])**

19) Shyam Cleave Buffer 2; **100uL/well; 2x; rinse then 15min @ RT**

| Cleave 2                         |            |        |
|----------------------------------|------------|--------|
| Reagent                          | Final Conc | Amnt   |
| MESNA (2-mercaptoethanolsulfate) | 50mM       | 0.082g |
| NaCl                             | 150mM      | 0.876g |
| TRIS HCl 1M pH 8.0               | 20mM       | 200uL  |



|     |  |            |
|-----|--|------------|
| UPW |  | Up to 10mL |
|-----|--|------------|

- 20) 2XSSCT rinse **x3**
- 21) 1M GHCL ; **2x 20min @ RT**
- 22) 2XSSCT washes; **2x 10min @ RT**
- 23) Repeat SBL (step 3 under Sequencing by Ligation) until BC is read
- 24) After imaging last bit of BC, skip QC and cleave; after imaging > 11, 12 > 16-22
- 25) Hybridize all hybe secondary; 30% form wash 7min → 2o (step 5a-7) and image in imaging buffer

**Immunofluorescence:**

- 26) Wash off Oligopaints 80% formamide/2XSSCT x2 10min RT > 2XSSCT 10min > 1XPBS 10min > 4% formaldehyde fix; 10min
- 27) 2XSSCT wash; **1x 10min @ RT**
- 28) PBS wash: **1x 10min @ RT**
- 29) 4% formaldehyde fix; **10min @ RT**
- 30) PBS rinse and wash; **5min @ RT**
- 31) PBTrition; **7min @ RT**
- 32) Block in 3% BSA/PBT; **>45min @ RT**
- 33) 1o Antibody in 1% BSA/PBT; **O/N @ 4oC**
- 34) PBTrition washes; **3x 5min @ RT**
- 35) 2o Antibody in 1% BSA/PBT (1:500 generally); **1hr @ RT**
- 36) PBTrition wash; **3x 5min @ RT**
- 37) Image in PBS
- 24) Profit \$\$\$\$

**Reagents:**

| Reagent                               | stock     | Brand   | Product #                 | Location            |
|---------------------------------------|-----------|---------|---------------------------|---------------------|
| Formaldehyde                          | 16%       | EMS     | <a href="#">15710</a>     | Chem Shelf          |
| RNaseA                                | 10mg/mL   | Thermo  | <a href="#">EN0531</a>    | -20oC               |
| Formamide                             | 100%      | EMD     | <a href="#">344206</a>    | 4oC                 |
| Dextran Sulfate                       | 100%      | Sigma   | <a href="#">D8906</a>     | 4oC                 |
| Shrimp Phosphatase                    | 1,000U/mL | NEB     | <a href="#">M0371L</a>    | -20oC               |
| Quick Ligation Buffer                 | 5X        | NEB     | <a href="#">B6058S</a>    | -20oC               |
| Quick Ligase                          |           | NEB     | <a href="#">M2200L</a>    | -20oC               |
| T3 DNA Ligase                         |           | NEB     | <a href="#">M0317L</a>    | -20oC               |
| Guanadine HCL                         | 100%      | Sigma   | <a href="#">G3273</a>     | Dessication chamber |
| Tetraspeck Beads                      |           | Thermo  | <a href="#">T7279</a>     | 4oC                 |
| True Black                            | 20X       | Biotium | <a href="#">23007</a>     | RT                  |
| Trolox                                | 100%      | Sigma   | <a href="#">238813</a>    | Chem Shelf          |
| PCD (Protocatechuate 3,4-Dioxygenase) | 100%      | Sigma   | <a href="#">P8279</a>     | -20oC               |
| PCA (Protocatechuic acid)             | 100%      | Sigma   | <a href="#">37580</a>     | Chem Shelf          |
| Quick CIP                             |           | NEB     | <a href="#">M0508L</a>    | -20oC               |
| AgNO3                                 | 0.1N      | EMD     | <a href="#">SX0206A-2</a> | 4oC walk            |

|                              |         |            |                         |            |
|------------------------------|---------|------------|-------------------------|------------|
| MESNA                        | 100%    | Sigma      | <a href="#">M1511</a>   | Chem Shelf |
| TRIS HCL 8.0                 | 1M      | Thermo     | <a href="#">AM9856</a>  | Chem Shelf |
| Protein Free Blocking Buffer | 1X      | Fisher     | <a href="#">P137570</a> | 4oC walk   |
| Digitonin                    | 5%      | Fisher     | <a href="#">BN2006</a>  | 4oC        |
| SYBR FITC                    | 10,000X | Invitrogen | <a href="#">S11494</a>  | -20oC      |

## Supplementary Protocol 4

### OligoFISSEQ on Hydrogels (PolyAcrylamide)

#### DAY 1 (2-3hrs):

- Plate cells onto 1mm glass microscope slides; score/etch cell area with diamond pen
- 100uL of cells per spot

#### FISH 1o (2-3hrs):

- 1) Rinse: 1X PBS wash; **5 min @ RT**
  - 2) Fix Cells; 4% Formaldehyde/PBS; (40mL = 10mL 16% formaldehyde + 4mL 10X PBS + 26mL H<sub>2</sub>O); **10 min @ RT**
    - 2a) 1XPBS rinse
  - 3) Permeabilize; 0.5% Triton/PBS; (40mL = 200uL Triton X-100 + 40mL 1X PBS); **15 min @ RT**
  - 4) PBT (PBS + 0.1% Triton) wash; **5 min @ RT**
  - 5) 0.1N HCl; 0.1N HCl/H<sub>2</sub>O; (40mL = 500uL 8N HCl + 39.5mL H<sub>2</sub>O); **5min @ RT**
  - 6) 2XSSCT washes; **2x 5min @ RT**
  - 7) Pre-hybe RT; 50% Formamide/2XSSCT; **10min @ RT**
  - 8) Pre-hybe 60oC; 50% Formamide/2XSSCT; **20min @ 60oC**
  - 9) 1o Oligopaint Hybridization;
    - \*\*\*Air dry slides and wipe around cell area
    - \*\*\*25uL per slide
    - \*\*\*Generally, 100pmol per slide
    - \*\*\*8X Hybe Buffer: 27-40% Crowding Agent (Dextran sulfate OR Polyacrylic Acid ~1200MW) + 8XSSCT
- \*\*\*Add to cells → cover with 22x22mm coverslip → seal edges with rubber cement → allow to dry before denaturing

| Reagent          | Stock      | Final         | Amount |
|------------------|------------|---------------|--------|
| Formamide        | 1          | 0.5           | 12.5   |
| Hybe Buffer      | 8X         | 2X            | 6.25   |
| RNAseA           | 10mg/uL    | 20mg          | 2      |
| 1o Oligopaint    | 100pmol/uL | 100pmol (2uM) | 1      |
| H <sub>2</sub> O | n/a        | n/a           | 3.25   |

- 10) Denature sample; **3min @ 80oC**
  - \*\*\*Perform on hot block
- 2) Hybridization; transfer samples to humid chamber and hybridize O/N @ **(42oC)**

#### Day 2 (8-9hrs):

- 3) 2XSSCT hot wash; **20min @ 60oC**
- 4) 2XSSCT washes @ RT; **2x 7min @ RT**
- 5) 30% formamide/2XSSCT (40mL = 12mL Formamide + 8mL H<sub>2</sub>O + 20mL 4XSSCT); **20min @ RT**
- 6) 2XSSCT washes; **2x 7min @ RT**
- 7) 0.2XSSC wash; **15min**

#### Gel Casting (~2-3hrs-O/N):

- 8) Cast hydrogel; **~22uL/slide; 90min @ RT**
  - \*\*\*Air dry slides and wipe around cell area

| Reagent                 | Manufacturer | Concentration | Final | Amount for 200uL | Amount for 3mL |
|-------------------------|--------------|---------------|-------|------------------|----------------|
| 40% Acrylamide/Bis 19:1 | Biorad       | 40%           | 4%    | 20               | 300            |

|                           |              |     |       |     |      |
|---------------------------|--------------|-----|-------|-----|------|
| <b>1M Tris HCl pH 8.0</b> | Invitrogen   | 1M  | 60mM  | 12  | 180  |
| <b>5M NaCl</b>            | Active Motif | 5M  | 300mM | 12  | 180  |
| <b>10% APS</b>            | Biorad       | 10% | 0.20% | 4   | 0    |
| <b>10% TEMED</b>          | Sigma        | 10% | 0.20% | 4   | 0    |
| <b>UPW</b>                |              |     |       | 148 | 2340 |

\*\*\*Use gelation chamber: 1mm slide wrapped in parafilm; using 2-22x22mm coverslips as spacers

\*\*\*Spot ~22uL hydrogel solution onto parafilm → wait ~10sec → drop slide with cells face down onto hydrogel solution → want a distinct disc/island to form → gel with parafilm slide on the bottom

9) Remove gelation chamber, cut, and rinse gels with **200uL** Zhuang digestion buffer:

\*\*\*Gently remove slide from gelation chamber; gel should stay stuck to cell area

\*\*\*Gently trim outer edges of gel with razor blade and discard

Zhuang digestion buffer:

(0.8M Guanadine-HCl, 50mM Tris-HCl pH8.0, 1mM EDTA, 0.5% Triton X-100, UPW)

10) Digest hydrogel; **~2mL/slide; O/N @ 37oC**

→ break non-cell area of glass slide with diamond pen → add gel/cell/slide sample to 35mm dish with

1:100 Proteinase K (NEB; 10mg/mL) in Zhuang digestion buffer → digest in humid chamber

### Day 3 (8-9hrs):

#### FISH 2o + Seq Primer (~2hrs):

1) Aspirate digestion solution and remove glass slide

2) 2XSSC washes; **1.5mL/dish; shaker; 20min x3 @ RT**

\*\*\*Cut off smaller pieces to proceed with 2o and sequencing

\*\*\*Move all pieces into 1.5mL Eppendorf tubes

3) 2XSSCT wash; **200uL/gel; 2x 7min @ RT nutator**

4) 2o Oligo + Sequencing Oligo Hybridization; **>1hr @ RT**

\*\*\*50uL per gel

\*\*\*Protect from light

| Reagent   | Stock     | Final  | Amount |
|-----------|-----------|--------|--------|
| Formamide | 100%      | 30%    | 15     |
| SSCT      | 4X        | 2X     | 25     |
| 2o Probe  | 10pmol/uL | 30pmol | 3      |
| Seq Probe | 10pmol/uL | 40pmol | 4      |
| H2O       | n/a       | n/a    | 3      |

1) 30% Formamide/2XSSCT washes; **2x 10min @ RT**

2) 2XSSCT washes; **3x 20min @ RT**

\*\*\*Perform on rocker/nutator

#### Sequencing by Ligation (5-6hrs):

3) Pre-Ligation wash; 1X *Quick Ligation Buffer*/H2O; **100uL/ch; 10min @ RT**

\*\*\*Use Quick Ligation buffer (stock = 5X)

4) Sequence by ligation; **100uL/ch; 1.5hr @ 25oC**

| Reagent | Stock | Amount |
|---------|-------|--------|
|         |       |        |

|                            |                       |     |
|----------------------------|-----------------------|-----|
| <b>Quick Ligase Buffer</b> | NEB; 2X               | 50  |
| <b>Quick Ligase</b>        | NEB; 2KU/uL           | 5   |
| <b>T3 Ligase</b>           | NEB; 3KU/uL           | 5   |
| <b>SOLiD Oligos</b>        | 5500 W SOLiD FWD75; ? | 2   |
| <b>UPW</b>                 |                       | 38  |
| <b>Total</b>               |                       | 100 |

\*\*\*Put in 25oC Drosophila incubator

- 5) 2XSSCT rinses; **3x @ RT**
- 6) 6XSSC 60oC washes; **2x 12min @ 60oC**
- 7) 2XSSCT washes on nutator; **3x 10min @ RT**
- 8) DAP (1:500 in 1XPBS); **10min @ RT**
- 9) 1XPBS wash; **10min @ RT**
- 10) Image in 1XPBS or without PBS; coat coverslip with gel slick beforehand
- 11) Cleave
- 9) Profit **\$\$\$\$**

## Supplementary Protocol 5

### OligoFISSEQ PadLock RCA on Ibidi Slides

\*\*\*Modifications from [BaristaSeq. Chen, Lee, and Zador. BioRxIV. 2017.](#)

#### DAY 1 (2-3hrs):

- Plate cells into Ibidi Sticky cell chambers (6 wells)
- 130-150uL per channel of reagent

#### FISH 1o (2-3hrs):

- 1) Aspirate media; 1X PBS wash; **5 min @ RT**
  - 2) Fix Cells; 4% Formaldehyde/PBS; (1mL = 250uL 16% formaldehyde + 100uL 10X PBS + 650uL H<sub>2</sub>O); **10 min @ RT**
  - 3) Permeabilize; 0.5% Triton/PBS; (1mL = 5uL Triton X-100 + 995uL 1X PBS); **15 min @ RT**
  - 4) PBT (PBS + 0.1% Triton) wash; **5 min @ RT**
  - 5) 0.1N HCl; 0.1N HCl/H<sub>2</sub>O; (1mL = 12.5uL 8N HCl + 987.5uL H<sub>2</sub>O); **5min @ RT**
  - 6) 2XSSCT washes; **2x 5min @ RT**
  - 6a) RNase treat; 2uL/50uL 2XSSCT; **1hr @ 37oC**
  - 7) Pre-hybe RT; 50% Formamide/2XSSCT; **10min @ RT**
  - 8) Pre-hybe 60oC; 50% Formamide/2XSSCT; **20min @ 60oC**
- \*\*\*Perform on hot block in pre-heated water bath  
\*\*\*Use weight on top of slide to press against block
- 9) 1o Oligopaint Hybridization;
- \*\*\*Prepare while sample is pre-hybing  
\*\*\*50uL per channel  
\*\*\*Generally, 100pmol per channel of each probe  
\*\*\*8X Hybe Buffer: 27-40% Crowding Agent (Dextran sulfate OR Polyacrylic Acid ~1200MW) + 8XSSCT

| Reagent          | Stock      | Final         | Amount |      |
|------------------|------------|---------------|--------|------|
| Formamide        |            | 1             | 0.5    | 25   |
| Hybe Buffer      | 8X         | 2X            |        | 12.5 |
| RNaseA           | 10mg/uL    | 20mg          |        | 2    |
| 1o Oligopaint    | 100pmol/uL | 100pmol (2uM) |        | 1    |
| H <sub>2</sub> O | n/a        | n/a           |        | 9.5  |

- 10) Denature sample; **3min @ 80oC**

\*\*\*Perform on hot block

- 2) Hybridization; transfer samples to humid chamber and hybridize O/N @ **(42oC)**

## Day 2 (4-5hrs):

3) 2XSSCT washes; **2x 15,20min @ 60oC**

\*\*\*Add 100uL pre-heated 2XSSCT into channels with 1o Oligopaint; **10min @ 60oC**

\*\*\*Aspirate and add 130uL pre-heated 2XSSCT; **10min @ 60oC**

\*\*\*On hot block as before

4) 2XSSCT washes @ RT; **2x 2min @ RT**

4a) CutSmart Buffer wash; 1X (50uL) in H<sub>2</sub>O; **1x 10min @ RT**

4b) Shrimp Phosphatase (NEB) treatment; 7.5U/50uL RXN; **1hr @ 37oC**

4c) Inactivate Phosphatase; transfer slide to 65oC heatblock; **5min**

4d) 2XSSCT washes @ 65oC; **2x 7min @ 65oC**

4e) 2XSSCT washes @ RT; **2x 5min @ RT**

### FISH/Circularize MIP (control) (~2 hrs):

5) MIP Hybridization; **>30min @ RT**

\*\*\*50uL per channel

\*\*\*Protect from light

| Reagent          | Stock     | Final  | Amount |
|------------------|-----------|--------|--------|
| Formamide        | 100%      | 30%    | 15     |
| SSCT             | 4X        | 2X     | 25     |
| MIP Probe        | 10pmol/uL | 40pmol | 4      |
| H <sub>2</sub> O | n/a       | n/a    | 6      |

6) 30% Formamide/2XSSCT washes; **2x 10min @ RT**

\*\*\*Add first wash directly to channel

7) 2XSSCT washes; **3x 7min @ RT**

\*\*\*110uL per channel

\*\*\*Perform on rocker/nutator

8) Pre-Ligation wash; 1X *Quick Ligation Buffer*/H<sub>2</sub>O; **100uL/ch; 10min @ RT**

\*\*\*Use Quick Ligation buffer (stock = 5X)

9) Circularize by ligation; 5uL of T<sub>3</sub> + 5uL of Quick Ligase/100uL Quick Ligase buffer; **1hr @ RT**

10) 2XSSCT rinse then washes; **3x 7min @ RT**

### Rolling Circle Amplification (RCA) (~3-O/N hrs):

11) RCA buffer wash; **100uL/well; 10min @ RT**

12) Rolling Circle Amplification (RCA); **100uL/well; 90min @ 37oC or O/N @ RT**

| Reagent          | Stock  | Final  | Amount |
|------------------|--------|--------|--------|
| Phi29 Buffer     | 10X    | 1X     | 10     |
| dNTP             | 10mM   | 0.25mM | 2.5    |
| AminoAllyl dUTP  | 4mM    | 0.08mM | 2      |
| Phi29 Polymerase | 10U/uL | 100U   | 10     |
| H <sub>2</sub> O | n/a    | n/a    | 75.5   |

13) PBS wash; **130uL/well; 1x 3min @ RT**

14) Cross link Rolonies with BS(Peg)900 (1mL = 20uL BS(PEG) + 980uL 1XPBS); **1hr @ RT**

15) PBS rinse

16) Quench BS(PEG) with 1M Tris HCl pH 8.0; **40min @ RT**

17) 2XSSCT washes; **3x 7min @ RT**

**Sequencing Primer Hybe and Sequencing By Ligation (3hrs+):**

18) Hybe Seq primer; **50uL/well; 1hr @ RT**

| Reagent    | Stock | Final | Amount |
|------------|-------|-------|--------|
| Formamide  | 100%  | 30%   | 15     |
| SSCT       | 4X    | 2X    | 25     |
| Seq Primer | 100uM | 2.5uM | 1.25   |
| H2O        | n/a   | n/a   | 8.75   |

18a) 30% formamide/2XSSCT wash; **3x 10min @ RT**

18b) 2XSSCT wash; **3x 7min @ RT**

19) Pre-Ligation wash; 1X *Quick Ligation Buffer*/H2O; **100uL/well; 10min @ RT**

\*\*\*Use Quick Ligation buffer (stock = 5X)

20) Sequence by ligation; **100uL/well; 1hr @ 25oC**

| Reagent             | Stock                 | Amount     |
|---------------------|-----------------------|------------|
| Quick Ligase Buffer | NEB; 2X               | 50         |
| Quick Ligase        | NEB; 2KU/uL           | 5          |
| T3 Ligase           | NEB; 3KU/uL           | 5          |
| SOLiD Oligos        | 5500 W SOLiD FWD75; ? | 2          |
| UPW                 |                       | 38         |
| <b>Total</b>        |                       | <b>100</b> |

\*\*\*Put in 25oC Drosophila incubator

21) 2XSSCT rinses; **3x @ RT**

22) 6XSSC 60oC washes; **2x 15min @ 60oC**

23) 2XSSCT washes on nutator; **3x 10min @ RT**

24) Image in 2XSSCT

25) Cleave

26) Profit **\$\$\$\$**
